# Supplementary material for: Hematite mesocrystals templated by hydrolyzed and aminolyzed glycidyl methacrylate, and their application in photocatalytic Fenton reaction
Source: Royal Society of Chemistry journal article supplement (doi:10.1039/c8ce01631c), 2019-01-01
Supplement: c8ce01631c1.pdf [file c8ce01631c1.pdf]

## Supporting Information

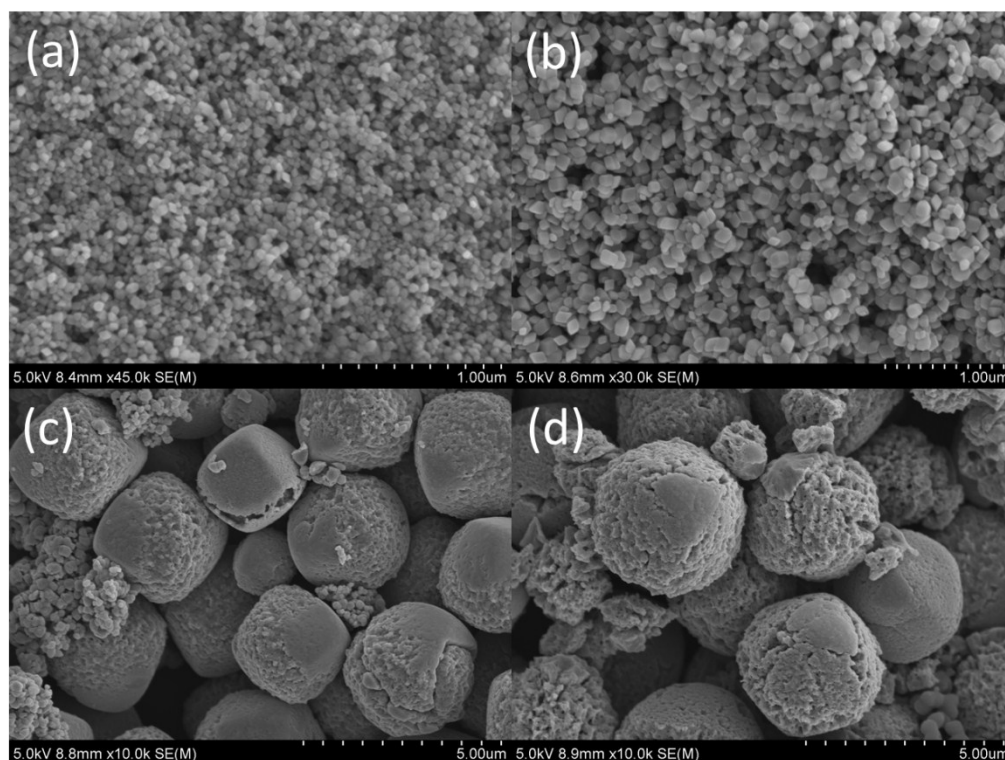

Fig. S1 Typical SEM images of samples obtained at 180 °C for different amounts of  $\text{FeCl}_3 \cdot 6\text{H}_2\text{O}$  template by A-GMA: a 3.13mg/L, b 6.25mg/L, c 33.75mg/L, d 50.63mg/L

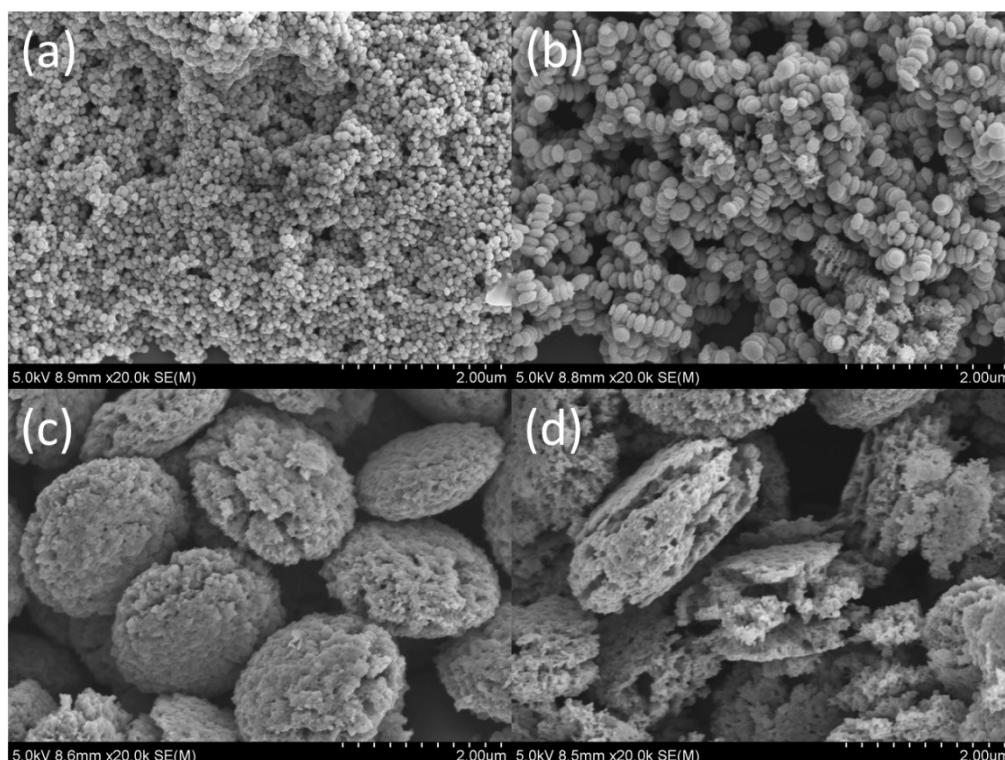

Fig. S2 Typical SEM images of samples obtained at 180 °C for different amounts of  $\text{FeCl}_3 \cdot 6\text{H}_2\text{O}$  template by H-GMA: a 3.13mg/L, b 6.25mg/L, c 33.75mg/L, d 50.63mg/L

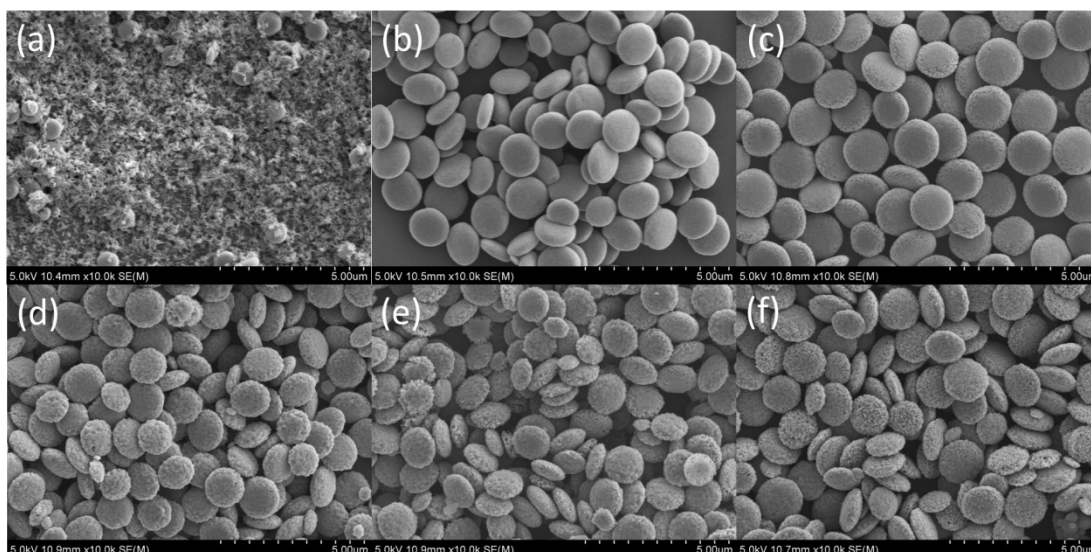

Fig. S3 Typical SEM images of samples prepared at 180°C (template by H-GMA) for different reaction time: a 1h, b 3h, c 5h, d 18h, e 24h, f 48h

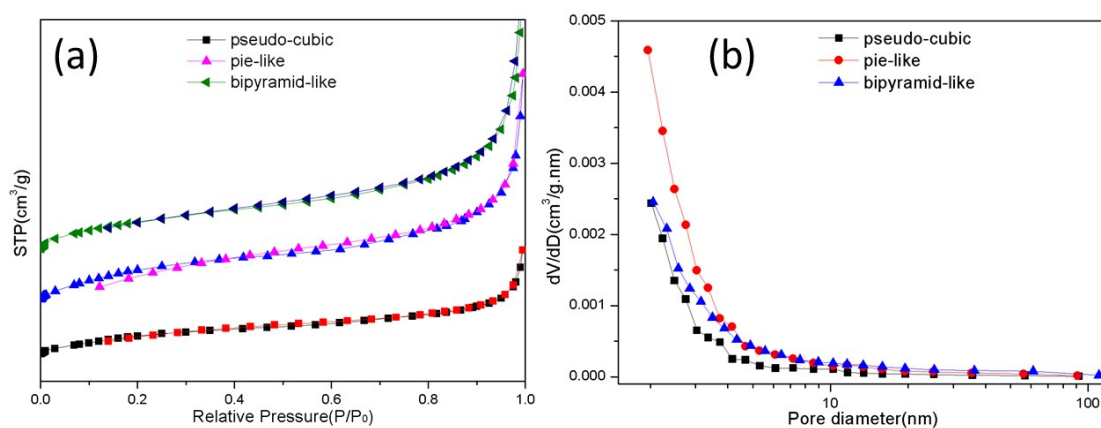

Fig. S4 N<sub>2</sub> adsorption–desorption isotherm and pore size distribution curves of as synthesis samples
